# Supplementary material for: The Epithelial-Mesenchymal Transcription Factor Slug Predicts Survival Benefit of Up-Front Surgery in Head and Neck Cancer
Source: MDPI journal article supplement (doi:10.3390/cancers13040772), 2021-02-12
Supplement: s1 [file s1]

# Supplementary Materials: The Epithelial-Mesenchymal Transcription Factor Slug Predicts Survival Benefit of up-front Surgery in Head and Neck Cancer

Herbert Riechelmann, Teresa Bernadette Steinbichler, Susanne Sprung, Matthias Santer, Annette Runge, Ute Ganswindt, Gabriele Gamerith and Jozsef Dudas

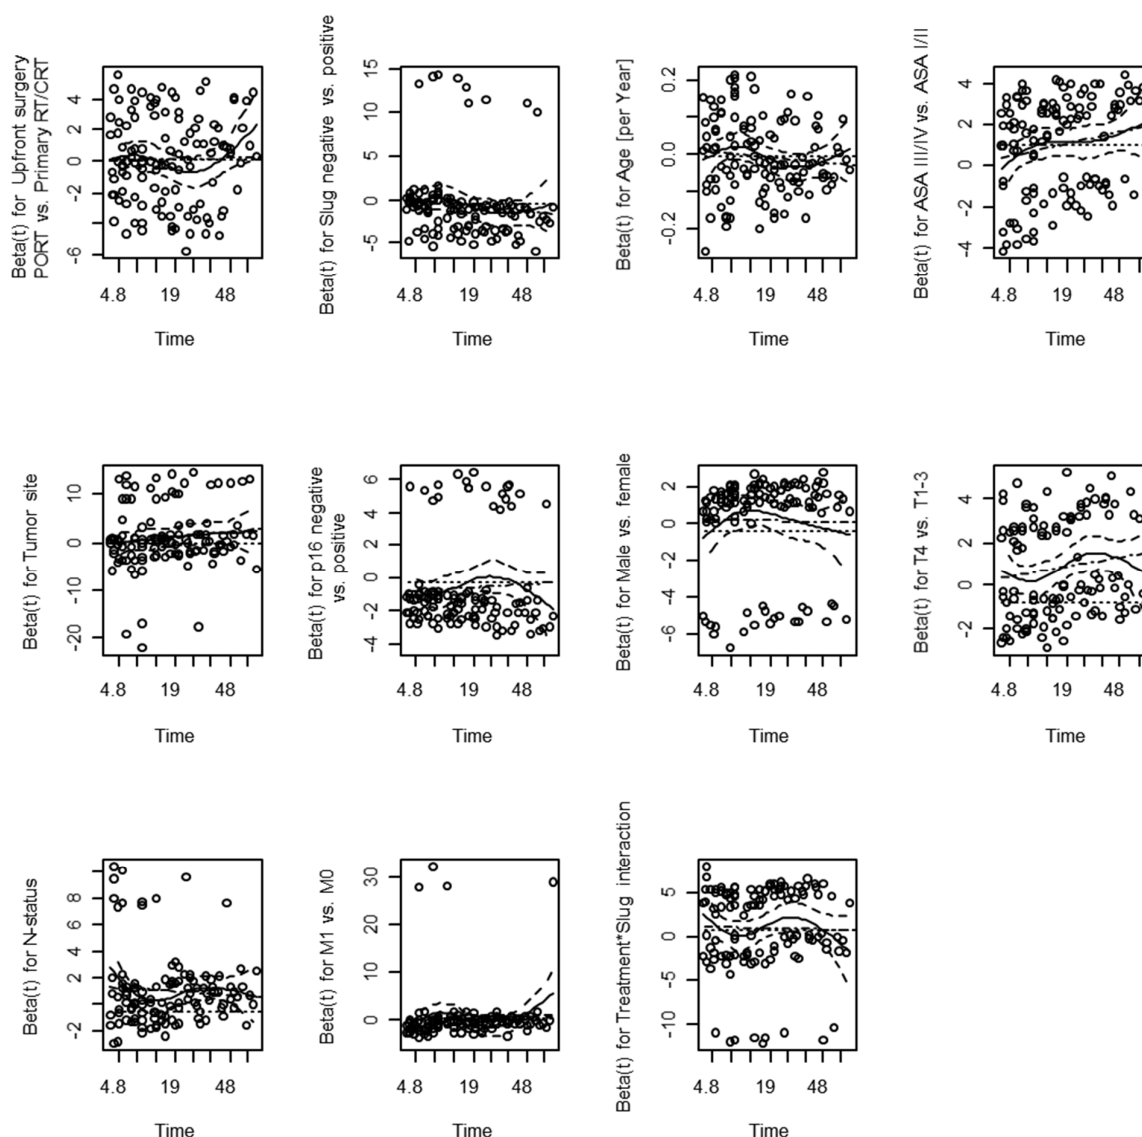

**Figure S1.** Scaled Schoenfeld residuals by time. Scaled Schoenfeld residuals obtained with the `cox.zph` function in the R Survival package (see main text). The regression lines of the scaled Schoenfeld residuals with survival time for uncensored cases did not substantially leave a horizontal 95% confidence band obtained with a loess smoother, indicating no relevant violation of the proportional hazard assumption.

**Table S1.** Details of treatment modalities.

| First-Line Treatment Modality      | Treatment Details                                                                | Count | Column % |
|------------------------------------|----------------------------------------------------------------------------------|-------|----------|
| Upfront surgery/PORT <sup>1)</sup> | Surgery only                                                                     | 79    | 48.5%    |
|                                    | Upfront surgery & postoperative radiotherapy                                     | 53    | 32.5%    |
|                                    | Upfront surgery & concurrent systemic therapy <sup>2)</sup> and RT <sup>3)</sup> | 31    | 19.0%    |
|                                    | Subtotal                                                                         | 163   | 100.0%   |
| Primary RT/CRT <sup>4)</sup>       | Primary RT                                                                       | 21    | 12.8%    |
|                                    | Primary concurrent systemic therapy <sup>2)</sup> and RT <sup>3)</sup>           | 143   | 87.2%    |
|                                    | Subtotal                                                                         | 164   | 100.0%   |
| Total                              |                                                                                  | 327   |          |

(1) PORT: postoperative radiotherapy (RT) or postoperative systemic therapy/radiotherapy (CRT); (2) Systemic therapy includes chemotherapy and/or immunotherapy; (3) RT: radiotherapy; (4) CRT: Chemoradiotherapy including immunoradiotherapy and systemic therapy/radiotherapy.

**Table S2.** Characteristics of patients treated with upfront surgery PORT vs. primary RT/CRT.

|                           |                      | First-line Treatment Modality |          |                |          |       |          |
|---------------------------|----------------------|-------------------------------|----------|----------------|----------|-------|----------|
|                           |                      | Upfront Surgery/PORT          |          | Primary RT/CRT |          | Total |          |
|                           |                      | Count                         | Column % | Count          | Column % | Count | Column % |
| Gender                    | male                 | 125                           | 77%      | 136            | 83%      | 261   | 80%      |
|                           | female               | 38                            | 23%      | 28             | 17%      | 66    | 20%      |
| ASA score                 | ASA I/II             | 102                           | 63%      | 90             | 55%      | 192   | 59%      |
|                           | ASA III/IV           | 61                            | 37%      | 74             | 45%      | 135   | 41%      |
| Smoking                   | < 10 pack-years      | 55                            | 34%      | 62             | 38%      | 117   | 36%      |
|                           | ≥ 10 pack-years      | 108                           | 66%      | 102            | 62%      | 210   | 64%      |
| Tumor site**              | Lips and oral cavity | 35                            | 21%      | 13             | 8%       | 48    | 15%      |
|                           | Oropharynx           | 57                            | 35%      | 87             | 53%      | 144   | 44%      |
|                           | Hypopharynx          | 20                            | 12%      | 25             | 15%      | 45    | 14%      |
|                           | Larynx               | 44                            | 27%      | 30             | 18%      | 74    | 23%      |
|                           | Others               | 7                             | 4%       | 9              | 5%       | 16    | 5%       |
| T stage (I–III vs. IV)*** | T1–3                 | 136                           | 83%      | 100            | 61%      | 236   | 72%      |
|                           | T4                   | 27                            | 17%      | 64             | 39%      | 91    | 28%      |
|                           | N0                   | 80                            | 49%      | 29             | 18%      | 109   | 33%      |
| N stage***                | N1                   | 34                            | 21%      | 35             | 21%      | 69    | 21%      |
|                           | N2                   | 47                            | 29%      | 85             | 52%      | 132   | 40%      |
|                           | N3                   | 2                             | 1%       | 15             | 9%       | 17    | 5%       |
| Distant metastasis*       | M0                   | 162                           | 99%      | 156            | 95%      | 318   | 97%      |
|                           | M1                   | 1                             | 1%       | 8              | 5%       | 9     | 3%       |
| p16 status*               | negative (≤60%)      | 130                           | 80%      | 111            | 68%      | 241   | 74%      |
|                           | positive (>60%)      | 33                            | 20%      | 53             | 32%      | 86    | 26%      |
| Slug IHC                  | negative             | 119                           | 73%      | 123            | 75%      | 242   | 74%      |
|                           | positive             | 44                            | 27%      | 41             | 25%      | 85    | 26%      |

\*  $p \leq 0.05$ ; \*\*  $p \leq 0.01$ ; \*\*\*  $p < 0.001$ .

**Table S3.** Results Cox proportional hazards analysis.

| Covariate                                                                     | Relative Risk <sup>(1)</sup> | p-Value |
|-------------------------------------------------------------------------------|------------------------------|---------|
| Primary RT/CRT vs. upfront surgery PORT                                       | 1.08 (0.65 to 1.81)          | 0.759   |
| Slug negative vs. positive                                                    | 0.55 (0.25 to 1.19)          | 0.13    |
| Age [per year]                                                                | 1 (0.98 to 1.02)             | 0.67    |
| ASA III/IV vs. ASA I/II                                                       | 2.71 (1.76 to 4.16)          | <0.001  |
| Larynx vs. hypopharynx                                                        | 0.73 (0.38 to 1.41)          | 0.35    |
| Oral cavity vs. hypopharynx                                                   | 0.76 (0.37 to 1.59)          | 0.472   |
| Oropharynx vs. hypopharynx                                                    | 0.7 (0.4 to 1.2)             | 0.193   |
| Other sites vs. hypopharynx                                                   | 0.47 (0.15 to 1.46)          | 0.191   |
| p16 positive vs. negative                                                     | 0.55 (0.33 to 0.93)          | 0.026   |
| Male vs. female                                                               | 1.16 (0.7 to 1.91)           | 0.572   |
| T4 vs T1-3                                                                    | 2.19 (1.43 to 3.36)          | <0.001  |
| N1 vs. N0                                                                     | 1.13 (0.57 to 2.23)          | 0.73    |
| N2 vs. N0                                                                     | 1.33 (0.8 to 2.21)           | 0.277   |
| N3 vs. N0                                                                     | 4.85 (2.13 to 11.05)         | <0.001  |
| M1 vs. M0                                                                     | 1.24 (0.44 to 3.49)          | 0.689   |
| Interaction of Slug IHC status * first-line treatment modality <sup>(2)</sup> | 3.09 (1.23 to 7.78)          | 0.017   |

<sup>(1)</sup> In brackets: lower and upper 95% confidence interval of relative risk; <sup>(2)</sup> Main outcome parameter.

**Table S4.** Proportional hazard tests. Proportional hazards assumption was tested with the cox.zph function from the R Survival package (see main text). The global test of proportional hazard assumptions was not significant and neither were the score tests for the single covariates, suggesting that the proportional hazard assumption of the model held.

| Covariate                              | Chisq   | df | p     |
|----------------------------------------|---------|----|-------|
| Upfront surgery PORT vs. PrimaryRT/CRT | 0.016   | 1  | 0.9   |
| Slug negative vs. positive             | 21.96   | 1  | 0.142 |
| Age [per year]                         | 0.14    | 1  | 0.708 |
| ASA III/IV vs. ASA I/II                | 24.31   | 1  | 0.106 |
| Tumor site                             | 53.79   | 4  | 0.254 |
| p16 negative vs positive               | 0.51    | 1  | 0.481 |
| Male vs. female                        | 0.00004 | 1  | 1.032 |
| T4 vs. T1-3                            | 38.45   | 1  | 0.053 |
| N-status                               | 40.63   | 3  | 0.253 |
| M1 vs. M0                              | 0.33    | 1  | 0.557 |
| Treatment*Slug interaction             | 14.54   | 1  | 0.233 |
| GLOBAL                                 | 218.19  | 16 | 0.108 |

**Table S5.** Total patient population and patients with available Slug IHC status (study population). Between January 2008 and December 2019, 1124 inpatients with incident HNC were treated. Slug immunohistochemistry (IHC) status was available for 354 patients, which were included as study population.

|                                  |                      | with Slug IHC |          | without Slug IHC |          | Total |          |
|----------------------------------|----------------------|---------------|----------|------------------|----------|-------|----------|
|                                  |                      | Count         | Column % | Count            | Column % | Count | Column % |
| Gender                           | male                 | 286           | 80.8%    | 597              | 77.5%    | 883   | 78.6%    |
|                                  | female               | 68            | 19.2%    | 173              | 22.5%    | 241   | 21.4%    |
|                                  | Total                | 354           | 100.0%   | 770              | 100.0%   | 1124  | 100.0%   |
| Age at first diagnosis **        | ≤50                  | 33            | 9.3%     | 105              | 13.6%    | 138   | 12.3%    |
|                                  | 51–60                | 122           | 34.5%    | 216              | 28.1%    | 338   | 30.1%    |
|                                  | 61–70                | 115           | 32.5%    | 235              | 30.5%    | 350   | 31.1%    |
|                                  | 71–80                | 70            | 19.8%    | 151              | 19.6%    | 221   | 19.7%    |
|                                  | >80                  | 14            | 4.0%     | 63               | 8.2%     | 77    | 6.9%     |
|                                  | Total                | 354           | 100.0%   | 770              | 100.0%   | 1124  | 100.0%   |
| ASA score                        | ASA I/II             | 198           | 56.3%    | 239              | 58.9%    | 437   | 57.7%    |
|                                  | ASA III/IV           | 154           | 43.8%    | 167              | 41.1%    | 321   | 42.3%    |
|                                  | Total                | 352           | 100.0%   | 406              | 100.0%   | 758   | 100.0%   |
| Smoking***                       | <10 pack-years       | 121           | 34.2%    | 190              | 46.5%    | 311   | 40.8%    |
|                                  | ≥10 pack-years       | 233           | 65.8%    | 219              | 53.5%    | 452   | 59.2%    |
|                                  | Total                | 354           | 100.0%   | 409              | 100.0%   | 763   | 100.0%   |
| Tumor site***                    | Lips/oral cavity     | 51            | 14.4%    | 131              | 17.0%    | 182   | 16.2%    |
|                                  | Oropharynx           | 158           | 44.6%    | 191              | 24.8%    | 349   | 31.0%    |
|                                  | Hypopharynx          | 48            | 13.6%    | 47               | 6.1%     | 95    | 8.5%     |
|                                  | Larynx               | 79            | 22.3%    | 182              | 23.6%    | 261   | 23.2%    |
|                                  | Others               | 18            | 5.1%     | 219              | 28.4%    | 237   | 21.1%    |
|                                  | Total                | 354           | 100.0%   | 770              | 100.0%   | 1124  | 100.0%   |
| T stage (I–III vs. IV)**         | T1–3                 | 246           | 69.5%    | 593              | 77.2%    | 839   | 74.8%    |
|                                  | T4                   | 108           | 30.5%    | 175              | 22.8%    | 283   | 25.2%    |
|                                  | Total                | 354           | 100.0%   | 768              | 100.0%   | 1122  | 100.0%   |
| N stage***                       | N0                   | 112           | 31.6%    | 370              | 48.2%    | 482   | 43.0%    |
|                                  | N1                   | 72            | 20.3%    | 100              | 13.0%    | 172   | 15.3%    |
|                                  | N2                   | 144           | 40.7%    | 272              | 35.4%    | 416   | 37.1%    |
|                                  | N3                   | 26            | 7.3%     | 26               | 3.4%     | 52    | 4.6%     |
|                                  | Total                | 354           | 100.0%   | 768              | 100.0%   | 1122  | 100.0%   |
| Distant metastasis*              | M0                   | 336           | 94.9%    | 749              | 97.3%    | 1085  | 96.5%    |
|                                  | M1                   | 18            | 5.1%     | 21               | 2.7%     | 39    | 3.5%     |
|                                  | Total                | 354           | 100.0%   | 770              | 100.0%   | 1124  | 100.0%   |
| p16 status                       | negative             | 262           | 74.2%    | 246              | 79.1%    | 508   | 76.5%    |
|                                  | positive             | 91            | 25.8%    | 65               | 20.9%    | 156   | 23.5%    |
|                                  | Total                | 353           | 100.0%   | 311              | 100.0%   | 664   | 100.0%   |
| First line treatment modality*** | Upfront surgery/PORT | 163           | 49.8%    | 473              | 66.7%    | 636   | 61.4%    |
|                                  | PrimaryRT/CRT        | 164           | 50.2%    | 236              | 33.3%    | 400   | 38.6%    |
|                                  | Total                | 327           | 100.0%   | 709              | 100.0%   | 1036  | 100.0%   |

\*  $p \leq 0.05$ ; \*\*  $p \leq 0.01$ ; \*\*\*  $p < 0.001$ .
